# Supplementary material for: Safety and Quality of Canned Sardines after Opening: A Shelf-Stability Study
Source: MDPI journal article supplement (doi:10.3390/foods11070991), 2022-03-29
Supplement: s1 [file s1]

## **Safety and quality of canned sardine after opening: a shelf-stability study**

Rebeca Cruz<sup>1\*</sup>, Vânia Pereira<sup>1</sup>, Teresa Pinho<sup>1</sup>, Isabel Ferreira<sup>1</sup>, Carla Novais<sup>2</sup> and Susana Casal<sup>1,3,\*</sup>

<sup>1</sup>LAQV/REQUIMTE, Laboratório de Bromatologia e Hidrologia, Faculdade de Farmácia, Universidade do Porto, Rua de Jorge Viterbo, Ferreira 228, 4050-313, Porto, Portugal.

<sup>2</sup>UCIBIO, Laboratório de Microbiologia, Faculdade de Farmácia, Universidade do Porto, Rua de Jorge Viterbo Ferreira 228, 4050-313, Porto, Portugal.

<sup>3</sup>EPIUnit e Instituto de Saúde Pública, Universidade do Porto, Rua das Taipas 135, 4050-600, Porto, Portugal.

\*Corresponding author: rcruz@ff.up.pt

**Table S1.** Relative composition and labelled shelf life of canned sardines.

| ID                                   | Ingredients   |                | Net weight/Drained weight (g/g) | Shelf life (years) |
|--------------------------------------|---------------|----------------|---------------------------------|--------------------|
|                                      | Description   | Percentage (%) |                                 |                    |
| <b>Sardine in light brine (SB)</b>   | Sardine       | 70             | 120/84                          | 3                  |
|                                      | Water         | 29             |                                 |                    |
|                                      | Salt          | 1              |                                 |                    |
| <b>Sardine in vegetable oil (SO)</b> | Sardine       | 70             | 120/84                          | 5                  |
|                                      | Vegetable oil | 29             |                                 |                    |
|                                      | Salt          | 1              |                                 |                    |
| <b>Sardine in tomato sauce (ST)</b>  | Sardine       | 65             | 120/78                          | 4                  |
|                                      | Tomato        | 30             |                                 |                    |
|                                      | Vegetable oil | 4              |                                 |                    |
|                                      | Salt          | 1              |                                 |                    |
